# Supplementary material
Source: PubMed Central journal article supplement (PMC7095789)
Supplement: 41591_2004_BFnm1024_MOESM1_ESM.pdf [file 41591_2004_BFnm1024_MOESM1_ESM.pdf]

**Supplementary Figure 1: LLC-MK2 cells infected with HCoV-NL63.**

**A**

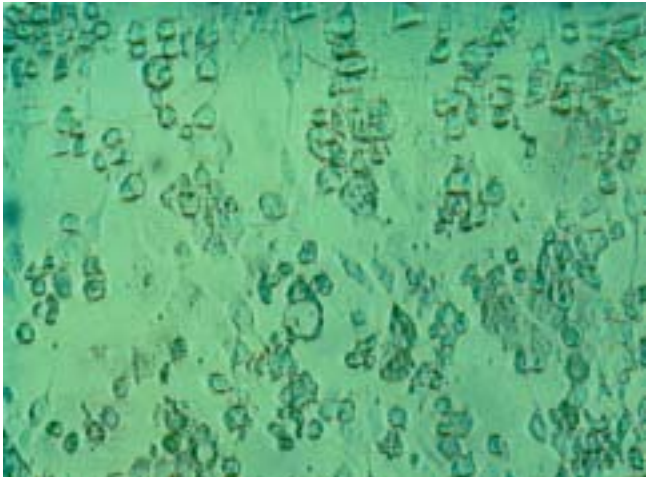

**B**

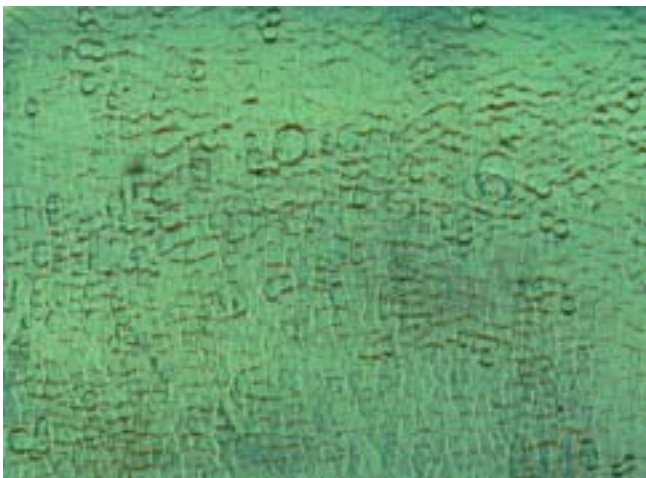

Supplementary Fig. 1. LLC-MK2 cells infected with HCoV-NL63. **(a)** The CPE of HCoV-NL63 in LLC-MK2 cells. **(b)** Non-infected LLC-MK2 cells.
