# Supplementary material
Source: PubMed Central journal article supplement (PMC7095789)
Supplement: 41591_2004_BFnm1024_MOESM2_ESM.pdf [file 41591_2004_BFnm1024_MOESM2_ESM.pdf]

## Supplementary Figure 2: VIDISCA fragments of HCoV-NL63

14-6 15073-15279

AACAAAAATTTGAATGAGGGTGTCTTGAATCTTTTCTGTACACTTCTTGATAATCAAGAAGATAAGTTTGGTGTGAAGAT  
TTTTATGCTAGTATGTATGAAAATTCTACAATATTGCAAGCTGCTGGTTTATGTGTTGTTTGTGGTTCACAACTGTACTTCGT  
TGTGGTGATTGTCTGCGTAAGCCATGTTGTGCACTAAA

10-1 15966-16085

TAATGTCAGTGTATGCATATGCTAATTTGGTTCCATATTACCAACTTATTGGTAAACAAAAGATAACTACAATACAGGGTCCTCC  
TGGTAGTGGTAAGTCACATTGTTCCATTGGACTTGG

1-2 16110-16237

TGTTTTTGTGCTTGTGCCCATGCTGCTGTTGATTCCCTTATGTGCAAAAAGCTATGACTGTTTATAGCATTGATAAGTGTACTAG  
GATTATACCTGCAAGAGCTCGGGTTGAGTGTTATAGTGGCTTTA

18-4 18363-18472

TAGTAGTGTGTTACTCGTTGTAATATAGGTGGTGCTGTTTGTTCAAAACATGCAAATTTGTATCAAAAATATGTTGAGGCATA  
TAATACATTTACACAGGCAGGTTTTA

16-6 20403-20685

GAGTGGTAGGTTGTTGTTACGCAATAATGGTCGTTTTGGTGGTTTTAGTAATCATTTAGTCTCAACTAAATGAACTTTTCTTG  
ATTTTGCTTGTGTTTGGCCCTGGCCCTTGTCTTTTTCACATGTAATAGTAATGCTAATCTCTCTATGTTACAATTAGGTGTTCCCT  
GACAATCTTCAACTATTGTTACGGGTTTATTGCCAACTCATTGGTTTTGTGCTAATCAGAGTACATCTGTTTACTCAGCCAAT  
GGTTTCTTTTATATTGATGTTGGTAATCACC

20-1 20699-20762

GCTCCATACTGGTTATTATGATGCTAATCAGTATTATATTTATGTTACTAATGAAATAGGCTTA

23-5 20885-20991

GCCTTTGGGCATAACTATATCTGGTAAAAGTGTGCGTCTGCATTTATATAATGTAACCTCGTACTTTTTATGTGCCAGCAGCTTA  
TAACTTACTAACTTAGTGTTA

22-2 21696-21747

GCCACAGATTTTTGGACGGTTGCATTTGCTACTTTTTGTTGATGTTTTGGTTA

4-6 22565-22712

TAATGAGTCTAGATATGGCTTGCAAACTTACTACAGTTACCTAATTTTATTATGTTAGTAATGGTGGTAACAATTGCACTAC  
GGCCGTTATGACTTATCTAATTTTGGTATTTGTGCTGATGGTCTTTGATTCTGTTCTGTC

11-6 26115-26320

TAATCTAACTAAACAAAATGGCTAGTGTAATTTGGGCCGATGACAGAGCTGCTAGGAAGAAATTTCCCTCCTCCTTCATTTTAC  
ATGCCCTTTTTGGTTAGTTCTGATAAGGCACCATATAGGGTCAATCCAGGAATCTTGCCCTATTGGTAAGGGTAATAAAGAT  
GAGCAGATTGGTTATTGGAATGTTCAAGAGCGTTGGCC

15-1 26327-26400

CAGGGGGCAACGTGTTGATTTGCCTCCTAAAGTTCATTTTTATTACCTAGGTAAGTGGACCTCATAAGGACCTTA

9-2 27329-27401

ATGATAAGGGTTTAGTCTTACACACAATGGTAGGCCAGTGATAGTAAAGTGAAGTAATTTGCTATCATATTA

22-3 27471-27526

GCCAAACATGGAAGAGCCAACAACATATCTAAAAATGTTTTGTCTGGTACTTGTTA

Supplementary Fig. 2: Sequence and coordinates of the 13 VIDISCA fragments of HCoV-NL63
