# Supplementary material
Source: PubMed Central journal article supplement (PMC7095789)
Supplement: 41591_2004_BFnm1024_MOESM3_ESM.pdf [file 41591_2004_BFnm1024_MOESM3_ESM.pdf]

10 20 30 40 50 60 70 80 90 100  
HCoV-NL63 TAATAATGCTGTCTATGATGGTCTCGTTATTTCTTCAGATTGTCTACTTTAGCTGTTACAGCTATTGTTGTAGTAGGTTGTTGAACATCTAAT  
466 .....  
246 .....  
251 .....  
496 .....G.....  
223 .....C.G.....  
248 .....G.....  
72 .....TA.....G.....

110 120 130 140 150 160 170 180 190 200  
HCoV-NL63 GTTCCAACAATTGTAGTGAGAAAATTCTGTTATGGATAAACTTGATACTGGTGACAAAAATTTCCAATTGGTGATTTGTTATGAATAACATTG  
466 .....  
246 .....C.....  
251 .....C.....  
496 .....T.....  
223 .....C.....  
248 .....C.....  
72 .....T.C.....G.....

210 220 230 240 250 260 270 280 290 300  
HCoV-NL63 TTCTGTTTTAACTGGTGGCTTAGTATGTTTAGTCTTTACGTACTTCTATTATGAAGCATGATATTAAAGTTATTGCCAAGGCTCCTAAACGTACAGG  
466 .....  
246 .....  
251 .....  
496 .....  
223 .....  
248 .....  
72 .....  
.....

310 320 330 340 350 360 370 380 390 400  
HCoV-NL63 TGTATTTTGACACGTAGTTTAAGTATAACATTAGATCTGCTTTGTTTATAAAGCAGAAGTGGTGTATTGTTACTTTGTTAAGTCTTATTA  
466 .....  
246 .....  
251 .....  
496 .....G.....G.....  
223 .....G.....G.....  
248 .....G.....G.....  
72 .....A.....G.....A.....G.....

410 420 430 440 450 460  
HCoV-NL63 TTATTATATGCTATTTATGCACTGTTTTATGATTGTGCAATTTAGTCCTTTAATAGTCTTTA  
466 .....  
246 .....  
251 .....  
496 .....  
223 .....  
248 .....  
72 .....  
.....

Nucleotide alignments of the 1a-RT-PCR sequences.
