# Supplementary material
Source: PubMed Central journal article supplement (PMC7095789)
Supplement: 41591_2004_BFnm1024_MOESM4_ESM.pdf [file 41591_2004_BFnm1024_MOESM4_ESM.pdf]

# Supplementary Figure 4: Alignment of Spike protein sequences

|                  | 10    | 20    | 30    | 40    | 50    | 60    | 70    | 80    | 90    | 100   |
|------------------|-------|-------|-------|-------|-------|-------|-------|-------|-------|-------|
| <b>HCov-NL63</b> | ..... | ..... | ..... | ..... | ..... | ..... | ..... | ..... | ..... | ..... |
| <b>HCov-229E</b> | ..... | ..... | ..... | ..... | ..... | ..... | ..... | ..... | ..... | ..... |
| <b>PEDV</b>      | ..... | ..... | ..... | ..... | ..... | ..... | ..... | ..... | ..... | ..... |
| <b>TGEV</b>      | ..... | ..... | ..... | ..... | ..... | ..... | ..... | ..... | ..... | ..... |
| <b>PRCoV</b>     | ..... | ..... | ..... | ..... | ..... | ..... | ..... | ..... | ..... | ..... |
| <b>FCoV</b>      | ..... | ..... | ..... | ..... | ..... | ..... | ..... | ..... | ..... | ..... |
| <b>CCoV</b>      | ..... | ..... | ..... | ..... | ..... | ..... | ..... | ..... | ..... | ..... |
| <b>FIPV</b>      | ..... | ..... | ..... | ..... | ..... | ..... | ..... | ..... | ..... | ..... |

## Supplementary Figure 4 (continued)

|                  | 910        | 920        | 930        | 940        | 950        | 960        | 970        | 980        | 990        | 1000        |
|------------------|------------|------------|------------|------------|------------|------------|------------|------------|------------|-------------|
| <b>HCov-NL63</b> | GNPRCKNLLK | QYTSACKTIE | DALRLSAHLE | TNDVSSMLTF | DSNAFSLANV | TSFG-----D | YNLSSVLPQR | -----      | -NIRSSRIAG | RSALIEDLLFS |
| <b>HCov-229E</b> | GNVRCVELLK | QYTSACKTIE | DALRNSARLE | SADVSEMLTF | DKKAFTLANV | SSFG-----D | YNLSSVIPSL | -----      | -PTSGRVAG  | RSALIEDLIFS |
| <b>PEDV</b>      | GNSRCKQLLT | QYTAACKTIE | SALQLSARLE | SVEVNSMLTI | SEALQLLATI | SSFNQDGYNF | TNVLGASVYD | -----      | -PASGRVVQK | RSVIEDLLFN  |
| <b>TGEV</b>      | GNPRCNKLLT | QYVSACQTIE | QALAMGARLE | NMEVDSMLFV | SENALKLASV | EAFNSSETLD | PIYKEWPNIG | GSWLEGLKYI | LPSHNSKRKY | RSALIEDLLFD |
| <b>PRCoV</b>     | GNPRCNKLLT | QYVSACQTIE | QALAMGARLE | NMEVDSMLFV | SENALKLASV | EAFNSSETLD | PIYQWPNIG  | GSWLEGLKYI | LPSHNSKRKY | RSALIEDLLFS |
| <b>FCoV</b>      | GNPRCNKLLT | QYVSACQTIE | QALAMGARLE | NMEVDSMLFV | SENALKLASV | EAFNSTENLD | PIYKEWPNIG | GSWLGGLKDI | LPSHNSKRKY | RSALIEDLLFD |
| <b>CCoV</b>      | GNSRCNKLLT | QYVSACKTIE | QALAMGARLE | NMEIDSMLFV | SENALKLASV | EAFNSTDNLD | PIYKEWPNIG | GSWLGGLKDI | LPSHNSKRKY | RSALIEDLLFD |
| <b>FIPV</b>      | GNTHCLKLLT | QYTSACQTIE | NALNLGARLE | SLMLNDMITV | SDRGLELATV | ERFNATALGG | EKLGGLYPDG | -----L     | SSLLPKIGK  | RSAVEDLLFN  |

  

|                  | 1010       | 1020       | 1030       | 1040       | 1050       | 1060       | 1070       | 1080        | 1090       | 1100        |
|------------------|------------|------------|------------|------------|------------|------------|------------|-------------|------------|-------------|
| <b>HCov-NL63</b> | KVVTSGLGTV | DVDYKCKCTG | LSIADLACAQ | YYNGIMVLPG | VADAERMAMY | TGSLIGGMVL | GGLTS-AAAI | PFSLALQARL  | NYVALQTDVL | QENQKILAAAS |
| <b>HCov-229E</b> | KLVTSGLGTV | DADYKCKCTG | LSIADLACAQ | YYNGIMVLPG | VADAERMAMY | TGSLIGGIAL | GGLTS-AVSI | PFSLAIQARL  | NYVALQTDVL | QENQKILAAAS |
| <b>PEDV</b>      | KVVTNGLGTV | DEDYKRCNSG | RSVADLVCAQ | YYSGVMLVPG | VVDAEKLHMY | SASLIGGMAL | GGITA-AAAL | PFYSYAVQARL | NYVALQTDVL | QRNQQLLAAS  |
| <b>TGEV</b>      | KVVTSGLGTV | DEDYKRCCTG | YDIADLVCAQ | YYNGIMVLPG | VANADKMTMY | TASLAGGITL | GALGGGAVAI | PFYAVAVQARL | NYVALQTDVL | NKNQKILASA  |
| <b>PRCoV</b>     | KVVTSGLGTV | DEDYKRCCTG | YDIADLVCAQ | YYNGIMVLPG | VANADKMTMY | TASLAGGITL | GAPGGGAVSI | PFYAVAVQARL | NYVALQTDVL | NKNQKILASA  |
| <b>FCoV</b>      | KAVTSGLGTV | DEDYKRCCTG | YDIADLVCAQ | YYNGIMVLPG | VANADKMTMY | TASLAGGITL | GALGGGAVAI | PFYAVAVQARL | NYVALQTDVL | NKNQKILANA  |
| <b>CCoV</b>      | KVVTSGLGTV | DEDYKRCCTG | YDIADLVCAQ | YYNGIMVLPG | VANADKMTMY | TASLAGGITL | GALGGGAVSI | PFYAVAVQARL | NYVALQTDVL | NKNQKILANA  |
| <b>FIPV</b>      | KVVTSGLGTV | DDDYKCCSSG | TDVADLVCAQ | YYNGIMVLPG | VVDGNKMSMY | TASLIGGMAL | GSITS-AVAV | PFAMQVQARL  | NYVALQTDVL | QENQKILANA  |

  

|                  | 1110        | 1120       | 1130       | 1140       | 1150       | 1160       | 1170       | 1180       | 1190        | 1200       |
|------------------|-------------|------------|------------|------------|------------|------------|------------|------------|-------------|------------|
| <b>HCov-NL63</b> | FNKAINMIVA  | SPSSVNDAIT | QTAEAIHTVT | IALNKIQDVF | NOQGSALNHL | TSQLRHNFOA | ISNSIQAIYD | RLDISIADQQ | VDRLITGRILA | ALNAFVSVQL |
| <b>HCov-229E</b> | FNKAMTNIIVD | AFTGVNDAIT | QTSQALQTV  | TALNKIQDVF | NOQGSALNHL | TSQLRQNFQA | ISSSIQAIYD | RLDTIQADQQ | VDRLITGRILA | ALMVFVSHTL |
| <b>PEDV</b>      | FNSAIEGNITV | AFESVKEAIS | QTSKGLNTVA | HALTRVQEVV | NSQGSALNQL | TVQLQHNFOA | ISSSIDDIYS | RDLILSADVQ | VDRLITGRILA | ALMVFVSVQL |
| <b>TGEV</b>      | FNQAIIGNITQ | SFGKVNDAIH | QTSRGLATVA | KALAKVQDVF | NIQQQALSHL | TVQLQNNFOA | ISSSISDIYN | RDELSDADAQ | VDRLITGRILT | ALMVFVSVQL |
| <b>PRCoV</b>     | FNQAIIGNITQ | SFGKVNDAIH | QTSRGLTVA  | KALAKVQDVF | NIQQQALSHL | TVQLQNNFOA | ISSSISDIYN | RDELSDADAQ | VDRLITGRILT | ALMVFVSVQL |
| <b>FCoV</b>      | FNQAIIGNITQ | AFGKVNDAIH | QTSKGLATVA | KALAKVQDVF | NIQQQALSHL | TVQLQNNFOA | ISSSISDIYN | RDELSDADAQ | VDRLITGRILT | ALMVFVSVQL |
| <b>CCoV</b>      | FNQAIIGNITQ | AFGKVNDAIH | QTSKGLATVA | KALAKVQDVF | NIQQQALSHL | TVQLQNNFOA | ISSSISDIYN | RDELSDADAQ | VDRLITGRILT | ALMVFVSVQL |
| <b>FIPV</b>      | FNNAIGNITL  | ALGKVSNAIT | TTSDFGNSMA | SALTKIQSVV | NOQGEALSQ  | TSQLQKNFOA | ISSSIAEYIN | RLEKVEADAQ | VDRLITGRILA | ALMVFVSVQL |

  

|                  | 1210       | 1220        | 1230       | 1240       | 1250       | 1260        | 1270       | 1280       | 1290       | 1300        |
|------------------|------------|-------------|------------|------------|------------|-------------|------------|------------|------------|-------------|
| <b>HCov-NL63</b> | NKYTEVRGSR | RLAQKKNVNEC | VKSQSNRYGF | CG-NGTHLFS | IVNSAPDGLL | FLHTVLLPTD  | YKNVKAWSGI | CVDGIYGYVL | RQP-----N  | LVLYSDNGVVF |
| <b>HCov-229E</b> | TKYTEVRASR | QLAQKKNVNEC | VKSQSKRYGF | CG-NGTHLFS | IVNSAPEGLV | FLHTVLLPTQ  | YKDVAEASGL | CVDGTNGYVL | RQP-----N  | LALYKEGNYFY |
| <b>PEDV</b>      | TKYTEVQASR | KLAQKKNVNEC | VKSQSQRVGF | CGDGEHIFS  | LVQAAPQGLL | FLHTVLLVPGD | FVNVLAIAGL | CVNGEIALTL | REPGLVLFTH | ELQTYTATEY  |
| <b>TGEV</b>      | TRQAEVRASR | QLAKDKVNEC  | VRSQSQRVGF | CG-NGTHLFS | LANAAPNGMI | FFHTVLLPTA  | YETVTAWSGI | CASDGRFTFG | LVVKDVQLTL | FRNLDD--KF  |
| <b>PRCoV</b>     | TRQAEVRASR | QLAKDKVNEC  | VRSQSQRVGF | CG-NGTHLFS | LANAAPNGMI | FFHTVLLPTA  | YETVTAWSGI | CALDGRFTFG | LVVKDVQLTL | FRNLDD--KF  |
| <b>FCoV</b>      | TRQAEVRASR | QLAKDKVNEC  | VRSQSQRVGF | CG-NGTHLFS | LANAAPNGMI | FFHTVLLPTA  | YETVTAWSGI | CASDGRFTFG | LVVKDVQLTL | FRNLDD--KF  |
| <b>CCoV</b>      | TRQAEVRASR | QLAKDKVNEC  | VRSQSQRVGF | CG-NGTHLFS | LANAAPNGMI | FFHTVLLPTA  | YETVTAWSGI | CASDGRFTFG | LVVKDVQLTL | FRNLDD--KF  |
| <b>FIPV</b>      | TQYAEVKASR | QALAKKNVNEC | VKSQSNRYGF | CG-NGTHLFS | LVNSAPEGLL | FFHTVLLPTE  | WEVTAWSGI  | CVNDTYAYVL | KDFDHSIFS  | NG-----TY   |

  

|                  | 1310       | 1320       | 1330       | 1340       | 1350       | 1360       | 1370       | 1380       | 1390       | 1400       |
|------------------|------------|------------|------------|------------|------------|------------|------------|------------|------------|------------|
| <b>HCov-NL63</b> | RVTSRVMFQP | RLPVLSDVQ  | IYNCNVTFVN | ISRVELHTVI | PDYIDVKNKL | QEFQNLKPK- | --YVKPNFDL | TPFNLTYLNL | SSELKQLEAK | TASLPQTIVE |
| <b>HCov-229E</b> | RITSRIMPEP | RIPTMADFVQ | IENCNVTFVN | ISRSELQTVI | PEYIDVKNKL | QELSXYLKN- | --YTVPDLVV | EQYNTIILNL | TSEISTLENK | SABLNTYVQK |
| <b>PEDV</b>      | FVSSRRMPEP | RKPTVSDVQ  | IESCVVTVVN | LTSQDLDPVI | PDYIDVKNKL | DEILASLKN- | --RTGSPSLP | DVFNATYLNL | TGEIADLEQR | SESLRNTTEE |
| <b>TGEV</b>      | YLTPTRMYPQ | RVATSSDFVQ | IEGCDVLFVN | ATVSDLPSII | PDYIDINQTV | QDILENFRP- | -NWTVPELTF | DIFNATYLNL | TGEIADLEQR | SESLRNTTEE |
| <b>PRCoV</b>     | YLTPTRMYPQ | RVATSSDFVQ | IEGCDVLFVN | TTVSDLPSII | PDYIDINQTV | QDILENFRP- | -NWTVPELTL | DVFNATYLNL | TGEIADLEQR | SESLRNTTEE |
| <b>FCoV</b>      | YLTPTRMYPQ | RAATSSDFVQ | IEGCDVLFVN | ATVIDLPSII | PDYIDINQTV | QDILENFRP- | -NWTVPELTL | DIFNATYLNL | TGEIADLEQR | SESLRNTTEE |
| <b>CCoV</b>      | YLTPTRMYPQ | RVATSSDFVQ | IEGCDVLFVN | ATVIELPSII | PDYIDINQTV | QDILENFRP- | -NWTVPELPL | DIFNATYLNL | TGEIADLEQR | SESLRNTTEE |
| <b>FIPV</b>      | MVTPRMFQP  | RKQMSDFVQ  | ITSCEVTFLN | MTYTFQEIV  | IDYIDINKTI | ADMLEQYNFN | YTPPELNLLL | DIFNQTKLNL | TAEIDLEQR  | ADNLTTIAHE |

  

|                  | 1410       | 1420       | 1430       | 1440       | 1450       | 1460       | 1470       | 1480       |           |
|------------------|------------|------------|------------|------------|------------|------------|------------|------------|-----------|
| <b>HCov-NL63</b> | LQGLIDQINS | TYVDLKLNNR | FENYIKWPWW | VWLIISVVVF | VLLSLLVFCC | LSTGCCGCCN | CLTSSMRGCC | DCGSTKLPYY | EFEKVVHQ  |
| <b>HCov-229E</b> | LQTLIDNINS | TLVDLKLNNR | VETYIKWPWW | VWLCISVVLV | FVVSMLLLCC | CSTGCCGFFS | CFASSIRGCC | ESTKLPYYDV | EKI--HIQ  |
| <b>PEDV</b>      | LRLSLINNIN | TLVDLEWLN  | VETYIKWPWW | VWLIIVIVL  | FVVSLLVFCC | ISTGCCGCCG | CCGACFSGCC | RGPRLPQYEA | FEK--VHVQ |
| <b>TGEV</b>      | LAILIDNINN | TLVNLWLN   | IETYVKWPWW | VWLLIGLVVI | FCIPLLLFCC | CSTGCCGCGI | CLGSCCHSIC | SRRQFENYEP | IEK--VHVH |
| <b>PRCoV</b>     | LAILIDNINN | TLVNLWLN   | IETYVKWPWW | VWLLIGLVVI | FCIPLLLFCC | CSTGCCGCGI | CLGSCCHSIF | SRRQFENYEP | IEK--VHVH |
| <b>FCoV</b>      | LAILIDNINN | TLVNLWLN   | IETYVKWPWW | VWLLIGLVVI | FCIPLLLFCC | CSTGCCGCGI | CLGSCCHSMC | SRRQFENYEP | IEK--VHVH |
| <b>CCoV</b>      | LATLIDNINN | TLVNLWLN   | IETYVKWPWW | VWLLIGLVVI | FCIPLLLFCC | CSTGCCGCGI | CIGSCCHSMC | SRRQFESYEP | IEK--VHVH |
| <b>FIPV</b>      | LQQYIDNLNK | TLVDLDLWLN | IETYVKWPWW | VWLLIGLVVV | FCIPLLLFCC | LSTGFCCGCG | CVGSCCHSLC | SRRQFETYEP | IEK--VHIH |

Supplementary Fig. 4: Alignment of the sequence of the deduced Spike protein of the group 1 coronaviruses. The GenBank accession numbers of the sequences are provided in the

Supplementary Methods online.
