# Supplementary material
Source: PubMed Central journal article supplement (PMC7095789)
Supplement: 41591_2004_BFnm1024_MOESM6_ESM.pdf [file 41591_2004_BFnm1024_MOESM6_ESM.pdf]

**Supplementary Table 1: Coordinates and sizes of the ORFs of HCoV-NL63**

| Gene  | Start | Stop  | Length (bp) | Length (a.a.) | Frame |
|-------|-------|-------|-------------|---------------|-------|
| 1a    | 287   | 12439 | 12153       | 4050          | +2    |
| 1b    | 12439 | 20475 | 8037        | 2678          | +1    |
| S     | 20472 | 24542 | 4071        | 1356          | +3    |
| ORF 3 | 24542 | 25219 | 678         | 225           | +2    |
| E     | 25200 | 25433 | 234         | 77            | +3    |
| M     | 25442 | 26122 | 681         | 226           | +2    |
| N     | 26133 | 27266 | 1134        | 377           | +3    |
