# Supplementary material
Source: PubMed Central journal article supplement (PMC7095789)
Supplement: 41591_2004_BFnm1024_MOESM7_ESM.pdf [file 41591_2004_BFnm1024_MOESM7_ESM.pdf]

**Supplementary Table 2: The leader TRS and putative body TRS of the associated ORF**

|        | TRS sequence*                            | Position    |
|--------|------------------------------------------|-------------|
| Leader | <u>CUUCUCAACUAAACGA</u>                  | 60-75       |
| S      | AGUCUCAACUAA <b>AUG</b>                  | 20460-20474 |
| ORF 3  | UGGUUCAACUAAACN <sub>37</sub> <b>AUG</b> | 24491-24544 |
| E      | <u>CUUCUCAACUAUACGAAG</u> <b>AUG</b>     | 25182-25202 |
| M      | UGUCUAAACUAAAC <b>GAUG</b>               | 25427-25444 |
| N      | <u>AAUCUAAACUAAACAAA</u> <b>AUG</b>      | 26116-26135 |

\*: TRS elements are underlined, startcodons are in bold.
